# Supplementary material
Source: Springer Nature journal article supplement (https://www.springermedizin.de/resource/supplementary/40345_2013_27_MOESM2_ESM.pdf/25658348)
Supplement: MOESM2 [file 25658348]

**Table 2. Comparison of baseline levels of stigma (DMISS) between healthcare providers and people with BD**

|                                  | Provider |      |      | Person with BD |      |      |                    |     |      |
|----------------------------------|----------|------|------|----------------|------|------|--------------------|-----|------|
|                                  | N        | M    | SD   | N              | M    | SD   | t                  | df  | P    |
| Stigma (DMISS) ( $\alpha=0.89$ ) |          |      |      |                |      |      |                    |     |      |
| Treatability***                  | 84       | 1.74 | 0.76 | 80             | 2.48 | 1.16 | -4.82 <sup>a</sup> | 135 | .000 |
| Relationship disruption***       | 84       | 2.38 | 0.99 | 80             | 3.22 | 1.23 | -4.82 <sup>a</sup> | 152 | .000 |
| Hygiene**                        | 84       | 1.93 | 0.99 | 80             | 2.44 | 1.30 | -2.80 <sup>a</sup> | 148 | .006 |
| Anxiety                          | 84       | 1.71 | 0.89 | 80             | 1.97 | 0.99 | -1.75              | 162 | .083 |
| Visibility                       | 84       | 3.40 | 0.84 | 80             | 3.57 | 0.80 | -1.36              | 162 | .176 |
| Recovery***                      | 84       | 2.55 | 1.31 | 80             | 3.59 | 1.87 | -4.10 <sup>a</sup> | 141 | .000 |
| Professional efficacy            | 84       | 2.74 | 1.35 | 80             | 3.18 | 1.52 | -1.95              | 162 | .053 |
| Total***                         | 84       | 2.26 | 0.63 | 80             | 2.79 | 0.74 | -4.90              | 162 | .000 |

\*  $p < .05$ , 2-tailed; \*\*  $p < .01$ , 2-tailed; \*\*\*  $p < .001$ , 2-tailed

<sup>a</sup> Unequal variance t-test
